# Supplementary material
Source: PubMed Central journal article supplement (PMC6597385)
Supplement: JB.00764-18-s0001.pdf [file JB.00764-18-s0001.pdf]

# SUPPLEMENTAL INFORMATION

## Redefining the sRNA Transcriptome in *Streptococcus pneumoniae*

### Serotype 2 Strain D39

Dhriti Sinha<sup>1,2</sup>, Kurt Zimmer<sup>3</sup>, Todd A. Cameron<sup>2</sup>, Douglas B. Rusch<sup>4</sup>, Malcolm E. Winkler<sup>1#</sup>, and Nicholas R. De Lay<sup>2,5#</sup>

<sup>1</sup>Department of Biology, Indiana University Bloomington, Bloomington, IN 47405, USA

<sup>2</sup>Department of Microbiology and Molecular Genetics, McGovern Medical School, University of Texas Health Science Center, Houston, TX 77030, USA

<sup>3</sup>Indiana University School of Informatics, Computing and Engineering, Indiana University Bloomington, Bloomington, IN 47408, USA

<sup>4</sup>Center for Genomics and Bioinformatics, Indiana University Bloomington, Bloomington, IN 47405, USA

<sup>5</sup>MD Anderson Cancer Center UTHealth Graduate School of Biomedical Sciences, University of Texas Health Science Center, Houston, TX 77030, USA

**Running title:** Detection of New sRNAs in *S. pneumoniae* D39

**Keywords:** pneumococcus; small RNA identification; RNA-seq and dRNA-seq

#Correspondence should be sent to Nicholas R. De Lay (Tel: +1 (713) 500-6293; Email: [nicholas.r.delay@uth.tmc.edu](mailto:nicholas.r.delay@uth.tmc.edu)) and Malcolm E. Winkler (Tel: +1 (812) 856-1318; E-mail: [winklerm@indiana.edu](mailto:winklerm@indiana.edu))

26  
27  
28  
29  
30  
31  
32  
33  
34  
35  
36  
37  
38  
39

**TABLE OF CONTENTS**

**TABLE S1:** List showing the overlap between the sRNAs and riboswitches that were identified in *S. pneumoniae* D39V and D39W

**TABLE S2:** List of sRNAs predicted in TIGR4, the coordinates of which are absent in D39W

**TABLE S3:** Classification of *S. pneumoniae* D39W sRNAs into different functional categories

**TABLE S4:** List of *S. pneumoniae* D39 genes with antisense expression

**TABLE S5:** List of oligonucleotide probes used for Northern blot analysis

**FIGURE S1:** Transcriptome map of *S. pneumoniae* D39

**FIGURE S2:** Experimental design and data analysis pipeline used to identify sRNAs in D39W

**FIGURE S3:** Northern blots corresponding to sRNAs identified in sRNA-seq

**FIGURE S4:** Northern blots corresponding to sRNAs identified in dRNA-seq

**FIGURE S5:** Coverage graph of Spd\_sr110, identified as an sRNA in D39W

**FIGURE S6:** Schematic showing the strategy to identify sRNAs using RNA-seq

**SUPPLEMENTAL REFERENCES**

40

TABLE S1: List showing the overlap between the sRNAs and riboswitches that were

41

identified in *S. pneumoniae* D39V and D39W

| sRNA ID in D39V              | Coordinates in D39V     | Flanking genes                       | sRNA ID in D39W | Coordinates in D39W    | Identification in D39W |
|------------------------------|-------------------------|--------------------------------------|-----------------|------------------------|------------------------|
| <i>ccnC</i> <sup>a</sup>     | 23967-24065 (+)         | <i>spd_0024</i> ,<br><i>spd_0025</i> | <i>ccnC</i>     | 23967-24065 (+)        | dRNA-seq               |
| <i>scRNA</i>                 | 24632-24707 (+)         | <i>spd_0026</i>                      | <i>scRNA</i>    | 24632-24707 (+)        |                        |
| <i>srf-01</i>                | 29658-29873 (+)         | <i>spd_0033</i> ,<br><i>spd_0038</i> | ND              | ND                     | ND                     |
| <i>srf-02</i> <sup>a</sup>   | 39980-40186 (+)         | <i>spd_0047</i> ,<br><i>spd_0048</i> | <i>spd_sr5</i>  | 39980-40082 (+)        | sRNA-seq &<br>dRNA-seq |
| <i>srf-03</i> <sup>a</sup>   | 41719-41886 (+)         | <i>spd_0048</i> ,<br><i>comA</i>     | <i>spd_sr6</i>  | 41494-41559 (+)        | dRNA-seq               |
| <i>srf-04</i> <sup>b</sup>   | 13229-132308<br>(+)     | <i>tmrU</i> ,<br><i>spd_0128</i>     | <i>spd_sr37</i> | 131773-131842 (+)      | dRNA-seq               |
| <i>srf-05</i> <sup>b</sup>   | 149645 –<br>149877 (+)  | <i>spd_0143</i> ,<br><i>spd_0144</i> | <i>spd_sr14</i> | 149223-149341 (+)      | sRNA-seq               |
| <i>srf-06</i>                | 150711-150914<br>(-)    | <i>spd_0145</i> ,<br><i>spd_0144</i> | ND              | ND                     | ND                     |
| <i>ccnE</i> <sup>a</sup>     | 212734-212881<br>(+)    | <i>spd_0221</i> ,<br><i>spd_0222</i> | <i>ccnE</i>     | 212278 – 212425<br>(+) | sRNA-seq &<br>dRNA-seq |
| <i>ccnA</i> <sup>b</sup>     | 231599 –<br>231691 (+)  | <i>spd_0240</i> ,<br><i>ruvB</i>     | <i>ccnA</i>     | 231143 – 231235<br>(+) | dRNA-seq               |
| <i>ccnB</i> <sup>a</sup>     | 231786-231883<br>(+)    | <i>spd_0240</i> ,<br><i>ruvB</i>     | <i>ccnB</i>     | 231331 – 231427<br>(+) | dRNA-seq               |
| <i>srf-07</i> <sup>a</sup>   | 232279-232354<br>(+)    | <i>spd_0240</i> ,<br><i>ruvB</i>     | <i>spd_sr23</i> | 231823 – 232091<br>(+) | sRNA-seq &<br>dRNA-seq |
| <i>ccnD</i> <sup>a</sup>     | 234171-234264<br>(+)    | <i>spd_0242</i> ,<br><i>uppS</i>     | <i>ccnD</i>     | 233715 – 233809<br>(+) | dRNA-seq               |
| <i>srf-08</i>                | 282194-282479<br>(+)    | <i>spd_0284</i> ,<br><i>spd_0285</i> | ND              | ND                     | ND                     |
| <i>rnpB</i>                  | 344607-345007<br>(+)    | <i>spd_0339</i> ,<br><i>spd_0341</i> | <i>rnpB</i>     | 344150 – 344553<br>(+) |                        |
| <i>srf-10</i>                | 508697-508842<br>(+)    | <i>spd_0500</i> ,<br><i>bglG</i>     | <i>spd_sr33</i> | 508237 – 508335<br>(+) | sRNA-seq               |
| <i>srf-11</i> <sup>a</sup>   | 587896-587989<br>(+)    | <i>spd_0563</i> ,<br><i>spd_0564</i> | <i>spd_sr42</i> | 587439 – 587538<br>(+) | dRNA-seq               |
| <i>srf-12</i> <sup>d</sup>   | 742022-742141           | <i>spd_0726</i> ,<br><i>spd_0729</i> | ND              | ND                     | ND                     |
| <i>ssrA</i> <sup>a</sup>     | 781595-781939<br>(+)    | <i>spd_0768</i> ,<br><i>spd_0770</i> | <i>spd_sr46</i> | 781128 – 781485<br>(+) | sRNA-seq &<br>dRNA-seq |
| <i>srf-13</i> <sup>a,c</sup> | 826260 –<br>826587 (+)  | <i>spd_0808</i> ,<br><i>cad</i>      | <i>spd_sr49</i> | 825802 – 826129<br>(+) | sRNA-seq &<br>dRNA-seq |
| <i>srf-16</i>                | 1037649-<br>1037755 (-) | <i>spd_0914</i> ,<br><i>spd_0915</i> | ND              | ND                     | ND                     |
| <i>srf-17</i> <sup>b</sup>   | 1051910-<br>1052049 (-) | <i>spd_0899</i> ,<br><i>asd</i>      | <i>spd_sr17</i> | 912572 – 912715<br>(+) | sRNA-seq &<br>dRNA-seq |

|                                  |                       |                           |                  |                       |                     |
|----------------------------------|-----------------------|---------------------------|------------------|-----------------------|---------------------|
| <b>srf-18<sup>c</sup></b>        | 1079561-1079658 (-)   | <i>lacD, lacT</i>         | <i>spd_sr60</i>  | 1079135 – 1079199 (-) | dRNA-seq            |
| <i>srf-19</i>                    | 1170746 – 1170923 (+) | <i>spd_1136, spd_1137</i> | <i>spd_sr63</i>  | 1170288 – 1170385 (+) | sRNA-seq & dRNA-seq |
| <b>srf-21<sup>a</sup></b>        | 1528520-1528643 (-)   | <i>recG, spd_1506</i>     | <i>spd_sr83</i>  | 1528044 – 1528186 (-) | sRNA-seq & dRNA-seq |
| <i>srf-22</i>                    | 1548804-1549088 (-)   | <i>spd_1527, spd_1526</i> | ND               | ND                    | ND                  |
| <b>ssrS<sup>a</sup></b>          | 1598326 – 1598522 (+) | <i>spd_1580, spd_1581</i> | <i>spd_sr85</i>  | 1597869 – 1598142 (+) | sRNA-seq & dRNA-seq |
| <i>srf-24</i>                    | 1873736-1873781 (-)   | <i>mutS, spd_1902</i>     | <i>spd_sr105</i> | 1873276 - 1873324 (-) | dRNA-seq            |
| <b>srf-25<sup>a</sup></b>        | 1892857-1893007 (-)   | <i>spd_1924, spd_1923</i> | <i>spd_sr106</i> | 1892400 – 1892550 (-) | sRNA-seq & dRNA-seq |
| <i>srf-26</i>                    | 1949385-1949547(+)    | <i>spd_1974, arcA</i>     | ND               | ND                    | ND                  |
| <i>srf-27<sup>d</sup></i>        | 1973172-1973570 (-)   | <i>adcA, spd_1996</i>     | <i>spd_sr110</i> | 1973000 - 1973113 (-) | dRNA-seq            |
| <i>srf-28</i>                    | 1973509-1973913 (-)   | <i>adcA, spd_1996</i>     | <i>spd_sr112</i> | 1973342 - 1973456 (-) | dRNA-seq            |
| <i>srf-29</i>                    | 2008242-2008356 (-)   | <i>spd_2029, cbpD</i>     | ND               | ND                    | ND                  |
| <b>srf-30<sup>a,c</sup></b>      | 2020587-2020685 (-)   | <i>spd_2043, rpsB</i>     | <i>spd_sr116</i> | 2020112-2020228 (-)   | dRNA-seq            |
| <b>riboswitch-1<sup>a</sup></b>  | 174291-174470 (-)     | <i>ruvA, ribD</i>         | <i>spd_sr22</i>  | 173841 – 174014 (-)   | sRNA-seq & dRNA-seq |
| riboswitch-2                     | 376842-377047 (+)     | <i>spd_0371, spd_0372</i> | <i>spd_sr28</i>  | 376371 – 376530 (+)   | sRNA-seq & dRNA-seq |
| riboswitch-3                     | 381487-381662 (-)     | <i>spd_0376, serS</i>     | <i>spd_sr29</i>  | 381067 - 381205 (-)   | sRNA-seq & dRNA-seq |
| riboswitch-4                     | 441436-441663 (+)     |                           | ND               | ND                    | ND                  |
| <b>riboswitch-5<sup>a</sup></b>  | 497356-497561 (+)     | <i>spd_0490, spd_0491</i> | <i>spd_sr32</i>  | 496899 – 497104 (+)   | dRNA-seq            |
| riboswitch-6                     | 513346-513544 (+)     | <i>bglA-2, pheS</i>       | <i>spd_sr34</i>  | 512889 – 513087 (+)   | sRNA-seq & dRNA-seq |
| riboswitch-7                     | 632244-632347 (+)     | <i>spd_0436, spd_0437</i> | ND               | ND                    | ND                  |
| <b>riboswitch-8<sup>a</sup></b>  | 644329-644497 (+)     | <i>lctO, spd_0622</i>     | <i>spd_sr43</i>  | 643872 – 644040 (+)   | dRNA-seq            |
| riboswitch-9                     | 647211-647381 (+)     | <i>thiE-1, spd_0625</i>   | <i>spd_sr44</i>  | 646754 – 646926 (+)   | sRNA-seq & dRNA-seq |
| riboswitch-10 <sup>d</sup>       | 653914-654012 (-)     | <i>cspR, ribU</i>         | ND               | ND                    | ND                  |
| riboswitch-11                    | 849418-849636 (+)     | <i>spd_0831, spd_0833</i> | ND               | ND                    | ND                  |
| riboswitch-12                    | 864986-865160 (+)     | <i>spd_0850, pyrK</i>     | ND               | ND                    | ND                  |
| <b>riboswitch-13<sup>a</sup></b> | 996442-996678 (-)     | <i>ppC, spd_0954</i>      | <i>spd_sr12</i>  | 967941 – 968177 (+)   | dRNA-seq            |

|                                  |                     |                                      |                  |                       |                     |
|----------------------------------|---------------------|--------------------------------------|------------------|-----------------------|---------------------|
| riboswitch-14 <sup>d</sup>       | 1052832-1052928 (-) | <i>spd_0897</i> ,<br><i>spd_0898</i> | ND               | ND                    | ND                  |
| <b>riboswitch-15<sup>a</sup></b> | 1168835-1168970 (-) | <i>nth</i> , <i>pyrR</i>             | <i>spd_sr62</i>  | 1168377-1168512 (-)   | dRNA-seq            |
| riboswitch-16                    | 1175106-1175233 (+) | <i>gidB</i> , <i>uraA</i>            | <i>spd_sr64</i>  | 1174647 – 1174790 (+) | sRNA-seq & dRNA-seq |
| <b>riboswitch-17<sup>a</sup></b> | 1250018-1250194 (-) | <i>spd_1216</i> ,<br><i>spd_1217</i> | <i>spd_sr70</i>  | 1249557 – 1249736 (-) | sRNA-seq & dRNA-seq |
| <b>riboswitch-18<sup>a</sup></b> | 1326523-1326709 (-) | <i>spd_1308</i> ,<br><i>spd_1307</i> | <i>spd_sr74</i>  | 1326066 – 1326252 (-) | sRNA-seq & dRNA-seq |
| riboswitch-19                    | 1404449-1404618 (-) | <i>mntE</i> ,<br><i>spd_1383</i>     | ND               | ND                    | ND                  |
| <b>riboswitch-20<sup>a</sup></b> | 1459261-1459468 (+) | <i>spd_1441</i> ,<br><i>spd_1442</i> | <i>spd_sr80</i>  | 1458804 – 1458975 (+) | sRNA-seq            |
| riboswitch-21                    | 1491275-1491462 (-) | <i>divIVA</i> ,<br><i>ileS</i>       | ND               | ND                    | ND                  |
| <b>riboswitch-22<sup>a</sup></b> | 1619505-1619652 (-) | <i>spd_1605</i> ,<br><i>spd_1604</i> | <i>spd_sr88</i>  | 1619052 – 1619299 (-) | sRNA-seq & dRNA-seq |
| riboswitch-23                    | 1642795-1642969 (+) | <i>spd_1626</i> ,<br><i>xpt</i>      | ND               | ND                    | ND                  |
| <b>riboswitch-24<sup>a</sup></b> | 2006750-2006885 (-) | <i>cbpD</i> ,<br><i>spd_2027</i>     | <i>spd_sr114</i> | 2006263 – 2006428 (-) | sRNA-seq & dRNA-seq |

42  
43     <sup>a</sup>sRNAs validated for expression in this study.

44     <sup>b</sup>sRNAs validated for expression by Tsui et al 2010 (1).

45     <sup>c</sup>sRNAs validated for expression by Slager et al 2018 (2).

46     <sup>d</sup>sRNAs predicted to be present in D39V by Slager et al 2018 (2).

47     ND = not detected.

**Table S2: List of sRNAs predicted in TIGR4, the coordinates of which are absent in D39W**

| Mann et al (2012)      |         |         | Acebo et al (2012) |         |         |
|------------------------|---------|---------|--------------------|---------|---------|
| sRNA Name              | Start   | Stop    | sRNA Name          | Start   | Stop    |
|                        |         |         | <b>trn0027</b>     | 79336   | 79386   |
| <b>F1<sup>a</sup></b>  | 91593   | 91664   | <b>trn0036</b>     | 91593   | 91651   |
| <b>F56</b>             | 158993  | 159090  |                    |         |         |
|                        |         |         | <b>srn081</b>      | 273681  | 273799  |
|                        |         |         | <b>trn0256</b>     | 436064  | 436160  |
|                        |         |         | <b>srn135</b>      |         |         |
| <b>F12</b>             | 444624  | 444663  |                    | 438151  | 438276  |
|                        |         |         | <b>trn0290</b>     | 497393  | 497444  |
|                        |         |         | <b>srn151</b>      | 501260  | 501364  |
| <b>F57</b>             | 553923  | 553982  |                    |         |         |
| <b>F24</b>             | 610528  | 610660  |                    |         |         |
| <b>R13</b>             | 623327  | 623372  |                    |         |         |
|                        |         |         | <b>trn0355</b>     | 673130  | 673199  |
| <b>F29</b>             | 743792  | 743828  |                    |         |         |
| <b>F62</b>             | 995726  | 995787  |                    |         |         |
|                        |         |         | <b>srn266</b>      | 1035461 | 1035582 |
| <b>F40</b>             | 1063101 | 1063151 |                    |         |         |
| <b>F41<sup>a</sup></b> | 1071112 | 1071214 | <b>srn277</b>      | 1071102 | 1071212 |
| <b>F46</b>             | 1454220 | 1454277 |                    |         |         |
|                        |         |         | <b>trn0757</b>     | 1515505 | 1515588 |
| <b>R16</b>             | 1227703 | 1227744 |                    |         |         |
| <b>R12<sup>a</sup></b> | 1731041 | 1731440 | <b>trn0830</b>     | 1731046 | 1731098 |
|                        |         |         | <b>srn448</b>      | 1901982 | 1902084 |
| <b>R11</b>             | 2002164 | 2002195 |                    |         |         |

<sup>a</sup> sRNAs identified to be common in TIGR4 by Mann et al., 2012 (3) and Acebo et al., 2012 (4).

51

**Table S3: Classification of *S. pneumoniae* D39W sRNAs into different functional categories**

52

| sRNA name | Start   | End     | Upstream Gene   | Downstream Gene | Predicted/Putative Function                                                                                                                              |
|-----------|---------|---------|-----------------|-----------------|----------------------------------------------------------------------------------------------------------------------------------------------------------|
| Spd_sr46  | 781128  | 781485  | <i>spd_0768</i> | <i>spd_0770</i> | tmRNA <sup>a</sup> , defective in lung infection <sup>b</sup> , attenuated in invasive pneumonia model <sup>b</sup>                                      |
| Spd_sr85  | 1597869 | 1598142 | <i>spd_1580</i> | <i>spd_1581</i> | 6S RNA <sup>a</sup>                                                                                                                                      |
| Spd_sr48  | 862699  | 862827  | <i>spd_0846</i> | <i>infC</i>     | L20 leader <sup>a</sup>                                                                                                                                  |
| Spd_sr55  | 999541  | 999605  | <i>spd_0988</i> | <i>rplU</i>     | L21 leader <sup>a</sup>                                                                                                                                  |
| Spd_sr54  | 1215844 | 1215967 | <i>spd_1189</i> | <i>rplJ</i>     | L10 leader <sup>a</sup>                                                                                                                                  |
| Spd_sr43  | 643872  | 644040  | <i>lctO</i>     | <i>spd_0622</i> | TPP-riboswitch <sup>a</sup>                                                                                                                              |
| Spd_sr44  | 646754  | 646926  | <i>thiE-1</i>   | <i>spd_0625</i> | TPP-riboswitch <sup>a</sup> , defective replication in bloodstream <sup>b</sup>                                                                          |
| Spd_sr114 | 2006263 | 2006428 | <i>cbpD</i>     | <i>spd_2027</i> | TPP-riboswitch <sup>a</sup>                                                                                                                              |
| Spd_sr22  | 173827  | 173979  | <i>ruvA</i>     | <i>ribE</i>     | FMN-riboswitch <sup>a</sup>                                                                                                                              |
| Spd_sr28  | 376371  | 376530  | <i>spd_0371</i> | <i>spd_0372</i> | Glycine-riboswitch <sup>a</sup>                                                                                                                          |
| Spd_sr29  | 381067  | 381205  | <i>spd_0376</i> | <i>serS</i>     | T-box element <sup>a</sup>                                                                                                                               |
| Spd_sr32  | 496899  | 497104  | <i>spd_0490</i> | <i>spd_0491</i> | T-box element <sup>a</sup>                                                                                                                               |
| Spd_sr34  | 512889  | 513087  | <i>bglA-2</i>   | <i>pheS</i>     | T-box element <sup>a</sup> , defective in lung infection and nasopharynx colonization <sup>b</sup> , attenuated in invasive pneumonia model <sup>b</sup> |
| Spd_sr12  | 967941  | 968177  | <i>ppC</i>      | <i>spd_0954</i> | T-box element <sup>a</sup>                                                                                                                               |
| Spd_sr70  | 1249557 | 1249736 | <i>potD</i>     | <i>spd_1217</i> | T-box element <sup>a</sup>                                                                                                                               |
| Spd_sr74  | 1326066 | 1326252 | <i>spd_1308</i> | <i>spd_1307</i> | T-box element <sup>a</sup>                                                                                                                               |
| Spd_sr80  | 1458804 | 1458975 | <i>spd_1441</i> | <i>spd_1442</i> | T-box element <sup>a</sup>                                                                                                                               |
| Spd_sr88  | 1619052 | 1619299 | <i>spd_1605</i> | <i>spd_1604</i> | T-box element <sup>a</sup> , defective in lung infection <sup>b</sup>                                                                                    |
| Spd_sr62  | 1168377 | 1168512 | <i>nth</i>      | <i>pyrR</i>     | PyrR-regulated RNA                                                                                                                                       |
| Spd_sr64  | 1174647 | 1174790 | <i>gidB</i>     | <i>uraA</i>     | PyrR-regulated RNA <sup>c</sup> , defective in lung infection <sup>b</sup> , attenuated in invasive pneumonia model <sup>b</sup>                         |
| Spd_sr49  | 825802  | 826129  | <i>spd_0808</i> | <i>cad</i>      | defective in lung infection <sup>b</sup>                                                                                                                 |
| Spd_sr17  | 912572  | 912715  | <i>spd_0899</i> | <i>asd</i>      | defective in nasopharynx colonization <sup>b</sup>                                                                                                       |
| Spd_sr111 | 1973304 | 1973394 | <i>spd_1996</i> | <i>adcA</i>     | Toxin module III <sup>c</sup> , defective in nasopharynx colonization <sup>b</sup>                                                                       |
| CcnE      | 212278  | 212425  | <i>spd_0221</i> | <i>spd_0222</i> | Stationary phase autolysis <sup>d</sup> , competence development <sup>e</sup> , attenuated in invasive pneumonia model <sup>b</sup>                      |

|                  |         |         |                 |                 |                                 |
|------------------|---------|---------|-----------------|-----------------|---------------------------------|
| <b>Spd_sr23</b>  | 231823  | 232091  | <i>spd_0240</i> | <i>ruvB</i>     | Toxin module I <sup>c</sup>     |
| <b>Spd_sr24</b>  | 231853  | 232035  | <i>ruvB</i>     | <i>spd_0240</i> | Antitoxin sRNA I <sup>c</sup>   |
| <b>Spd_sr109</b> | 1972859 | 1973060 | <i>spd_1996</i> | <i>adcA</i>     | Toxin module II <sup>c</sup>    |
| <b>Spd_sr110</b> | 1973000 | 1973113 | <i>adcA</i>     | <i>spd_1996</i> | Antitoxin sRNA II <sup>c</sup>  |
| <b>Spd_sr112</b> | 1973342 | 1973456 | <i>adcA</i>     | <i>spd_1996</i> | Antitoxin sRNA III <sup>c</sup> |

53

54

<sup>a</sup>Function predicted from Rfam database.

55

<sup>b</sup> D39 sRNAs correspond to the sRNAs mutants in TIGR4 strain, which exhibited virulence defect in different host niches as determined by (3).

56

57

<sup>c</sup> D39 sRNAs in this functional category identified to be common between *S. pneumoniae* D39W (this study) and D39V (2). These specific functional categories are assigned to respective sRNAs by Slager et al., 2018 (2) in D39V.

58

59

60

<sup>d</sup> sRNA function first determined in *S. pneumoniae* R6 (5).

61

<sup>e</sup> sRNA function elucidated in D39 by Schnorpfeil et al 2013 (6) and Tsui et al 2010 (1).



TABLE S4: List of *S. pneumoniae* D39 genes with antisense expression<sup>a</sup>

| SPD #                  | Gene                                                             | Sense        | Antisense     | Antisense/<br>Sense |
|------------------------|------------------------------------------------------------------|--------------|---------------|---------------------|
| <i>spd_0022</i>        | pseudo gene                                                      | 202          | 26121         | 129                 |
| <i>spd_0034</i>        | IS1167, transposase, truncation                                  | 648          | 54856         | 85                  |
| <i>spd_0048</i>        | IS1167, transposase, truncated                                   | 5233         | 56419         | 11                  |
| <i>spd_0085</i>        | hypothetical protein                                             | 52           | 68430         | 1316                |
| <i>spd_0100</i>        | hypothetical protein                                             | 578          | 103989        | 180                 |
| <i>spd_0137</i>        | IS1167, transposase, truncated                                   | 4512         | 36854         | 8                   |
| <i>spd_0142</i>        | conserved hypothetical protein;                                  | 836          | 4311          | 5                   |
| <b><i>spd_0223</i></b> | iron(III) ABC transporter, permease protein                      | <b>1696</b>  | <b>8697</b>   | <b>5</b>            |
| <b><i>spd_0224</i></b> | iron(III) ABC transporter, permease protein                      | <b>1009</b>  | <b>5124</b>   | <b>5</b>            |
| <b><i>spd_0225</i></b> | ABC transporter, ATP-binding protein                             | <b>1161</b>  | <b>7847</b>   | <b>7</b>            |
| <b><i>spd_0413</i></b> | hypothetical protein                                             | <b>67</b>    | <b>34000</b>  | <b>507</b>          |
| <b><i>spd_0415</i></b> | transposase, IS116/IS110/IS902 family, degenerate                | <b>1313</b>  | <b>315472</b> | <b>240</b>          |
| <b><i>spd_0416</i></b> | transposase, IS116-IS110-IS902 family, degenerate                | <b>542</b>   | <b>106534</b> | <b>197</b>          |
| <i>spd_0450</i>        | type I restriction-modification system, S subunit, putative      | 20155        | 160108        | 8                   |
| <i>spd_0466</i>        | conserved hypothetical protein                                   | 1262         | 16139         | 13                  |
| <b><i>spd_0470</i></b> | <b><i>blpC</i></b>                                               | <b>278</b>   | <b>19445</b>  | <b>70</b>           |
| <b><i>spd_0471</i></b> | <b><i>blpB</i></b>                                               | <b>2082</b>  | <b>361566</b> | <b>174</b>          |
| <b><i>spd_0472</i></b> | <b><i>blpA</i></b>                                               | <b>10387</b> | <b>288906</b> | <b>28</b>           |
| <i>spd_0540</i>        | amino acid ABC transporter, amino acid-binding protein, putative | 10502        | 138547        | 13                  |
| <i>spd_0552</i>        | hypothetical protein                                             | 673          | 10445         | 16                  |
| <i>spd_0607</i>        | transposase, IS30 family, degenerate                             | 186          | 30722         | 165                 |
| <b><i>spd_0615</i></b> | ABC transporter, substrate-binding protein, truncated            | <b>3365</b>  | <b>26180</b>  | <b>8</b>            |
| <b><i>spd_0616</i></b> | amino acid ABC transporter, ATP-binding protein                  | <b>3051</b>  | <b>22951</b>  | <b>8</b>            |
| <b><i>spd_0618</i></b> | amino acid ABC transporter, permease protein                     | <b>991</b>   | <b>8219</b>   | <b>8</b>            |
| <b><i>spd_0638</i></b> | transposase family protein                                       | <b>650</b>   | <b>10972</b>  | <b>17</b>           |
| <b><i>spd_0639</i></b> | conserved hypothetical protein                                   | <b>285</b>   | <b>2399</b>   | <b>8</b>            |
| <i>spd_0682</i>        | hypothetical protein                                             | 1928         | 15842         | 8                   |
| <i>spd_0715</i>        | MutT/nudix family protein                                        | 613          | 4792          | 8                   |
| <i>spd_0758</i>        | IS1167 transposase, truncation                                   | 1960         | 801301        | 409                 |
| <i>spd_0770</i>        | tRNA-Ser                                                         | 168          | 845           | 5                   |
| <i>spd_0791</i>        | conserved hypothetical protein                                   | 1064         | 27564         | 26                  |

|                        |                                                            |              |               |           |
|------------------------|------------------------------------------------------------|--------------|---------------|-----------|
| <i>spd_0794</i>        | IS1381 transposase OrfA, truncated                         | 819          | 19512         | 24        |
| <i>spd_0810</i>        | pilin gene inverting-related protein, authentic frameshift | 1067         | 244038        | 229       |
| <i>spd_0831</i>        | conserved domain protein                                   | 1021         | 7845          | 8         |
| <i>spd_0841</i>        | <i>ald</i> (pseudo gene)                                   | 12126        | 124948        | 10        |
| <i>spd_0895</i>        | <i>hemH</i>                                                | 4218         | 66266         | 16        |
| <i>spd_0938</i>        | Tn5252, relaxase; truncated relative to TIGR4              | 1647         | 8488          | 5         |
| <i>spd_0966</i>        | IS1167, transposase, truncated                             | 6053         | 108659        | 18        |
| <i>spd_0975</i>        | DNA repair protein <i>radC</i> homolog                     | 6602         | 77356         | 12        |
| <i>spd_0992</i>        | conserved hypothetical protein                             | 101          | 1968          | 19        |
| <i>spd_0993</i>        | conserved hypothetical protein                             | 54           | 1013          | 19        |
| <i>spd_1059</i>        | hypothetical protein                                       | 44           | 784           | 18        |
| <i>spd_1189</i>        | conserved hypothetical protein                             | 256          | 1472836       | 5753      |
| <b><i>spd_1213</i></b> | membrane protein, putative                                 | <b>9134</b>  | <b>127449</b> | <b>14</b> |
| <b><i>spd_1214</i></b> | ABC transporter, ATP-binding protein                       | <b>4191</b>  | <b>40066</b>  | <b>10</b> |
| <i>spd_1261</i>        | conserved hypothetical protein                             | 1781         | 9001          | 5         |
| <i>spd_1266</i>        | membrane protein, putative                                 | 4490         | 22971         | 5         |
| <i>spd_1275</i>        | transcriptional regulator, GntR family                     | 96           | 11619         | 121       |
| <i>spd_1430</i>        | <i>fer</i>                                                 | 16179        | 79670         | 5         |
| <b><i>spd_1452</i></b> | membrane protein, putative; truncated relative to TIGR4    | <b>5519</b>  | <b>61420</b>  | <b>11</b> |
| <b><i>spd_1453</i></b> | pseudo gene                                                | <b>2444</b>  | <b>38771</b>  | <b>16</b> |
| <b><i>spd_1454</i></b> | conserved hypothetical protein                             | <b>12049</b> | <b>118485</b> | <b>10</b> |
| <b><i>spd_1455</i></b> | conserved hypothetical protein                             | <b>155</b>   | <b>2199</b>   | <b>14</b> |
| <b><i>spd_1456</i></b> | conserved hypothetical protein                             | <b>204</b>   | <b>3306</b>   | <b>16</b> |
| <i>spd_1500</i>        | ABC transporter, permease protein                          | 44           | 754           | 17        |
| <i>spd_1502</i>        | ABC transporter, substrate-binding protein                 | 280          | 1541          | 6         |
| <i>spd_1578</i>        | conserved hypothetical protein                             | 2047         | 16927         | 8         |
| <i>spd_1579</i>        | conserved hypothetical protein                             | 1676         | 28532         | 17        |
| <i>spd_1593</i>        | type IV prepilin peptidase, putative                       | 1547         | 12407         | 8         |
| <i>spd_1618</i>        | conserved hypothetical protein                             | 220          | 453455        | 2061      |
| <b><i>spd_1628</i></b> | <b><i>xpt</i></b>                                          | <b>2175</b>  | <b>18732</b>  | <b>9</b>  |
| <b><i>spd_1629</i></b> | <b><i>pbuX</i></b>                                         | <b>5962</b>  | <b>61196</b>  | <b>10</b> |
| <i>spd_1666</i>        | IS1167 transposase, truncation                             | 10284        | 124603        | 12        |
| <i>spd_1681</i>        | IS1167, transposase                                        | 606          | 35981         | 59        |
| <i>spd_1770</i>        | conserved hypothetical protein                             | 156          | 33068         | 212       |
| <i>spd_1795</i>        | hypothetical protein                                       | 1029         | 7597          | 7         |
| <i>spd_1901</i>        | transposase, putative                                      | 323          | 59946         | 186       |
| <i>spd_1906</i>        | IS1381, transposase OrfB                                   | 4511         | 185846        | 41        |
| <i>spd_1939</i>        | hypothetical protein                                       | 539          | 91168         | 169       |

|                 |                                           |     |        |     |
|-----------------|-------------------------------------------|-----|--------|-----|
| <i>spd_1955</i> | hypothetical protein                      | 409 | 52774  | 129 |
| <i>spd_1967</i> | IS1381, transposase OrfB                  | 473 | 124528 | 263 |
| <i>spd_1980</i> | IS3-Spn1, hypothetical protein, truncated | 419 | 2448   | 6   |
| <i>spd_1983</i> | hypothetical protein                      | 122 | 36220  | 297 |
| <i>spd_2001</i> | hypothetical protein                      | 87  | 3345   | 38  |
| <i>spd_2008</i> | group II intron, maturase, degenerate     | 346 | 6284   | 18  |
| <i>spd_2038</i> | conserved hypothetical protein            | 293 | 6298   | 21  |

63

64

<sup>a</sup>Bolded rows correspond to genes in an operon. The numbers in the sense and antisense

65

column represent the RPKM (Reads Per Kilobase of transcript per Million mapped reads) values

66

for the (+) and the (-) strand and the 'antisense/ sense' column represents the ratio between the

67

respective RPKM values of two strands for each gene.

**Table S5: List of oligonucleotide probes used for Northern blot analysis**

| <b>sRNA name</b>          | <b>Oligonucleotide probe sequence in 5'-3' direction</b> |
|---------------------------|----------------------------------------------------------|
| Spd_sr5 <sup>a</sup>      | CAAATAAATCATTGATAGTAACACTTACGACATCC                      |
| Spd_sr6 <sup>a</sup>      | GGAAATCATCGCCAAACTGGACTACGACGCCCCATC                     |
| Spd_sr8                   | CAAACCGCGTCAACGTCGCCTTGCCGTATAGATGTTACTG                 |
| Spd_sr13                  | CAGTGTTTTTGAGCAGCCCGCAGCTAGTTTCCTAGTTTG                  |
| Spd_sr16 <sup>a</sup>     | GAAATATTTTAACGGTCATAACGGACTATTCCAGA                      |
| Spd_sr19                  | CATTCCATTTTGTGTCTAGATTGACCTTGATTGCGTTAC                  |
| Spd_sr20                  | GCCCCATATGACCTATAATGAAAAGCGTCTAACCAACTC                  |
| Spd_sr22                  | CATCCAGACTATACTGTCGGCTTTGGAATTTACC                       |
| Spd_sr23                  | CTTCGTATAGTCGATAAATGGCTAAACAAGGACAA                      |
| Spd_sr24                  | CCATCATGGGCTATCTCACCTCCTTTCGTAGGCGG                      |
| Spd_sr31                  | TAAAACCAAACCAGCTCCTAGTAAGGCTAGAAGGG                      |
| Spd_sr32                  | AACCAGTTTTGACACATTTGTGGACTTCTCAGCG                       |
| Spd_sr35                  | GGGATAACAAAGAGAATGACCGAAAGGGCAGAGAG                      |
| Spd_sr36-1 <sup>a,b</sup> | GCCGTCAAGCAACTCAAAGGAAAATAGGAAATCGA                      |
| Spd_sr36-2 <sup>b</sup>   | CGGGCGATTAGCTAAATGCTTTACTAACTCTCTCG                      |
| Spd_sr42                  | GTTACGATAGTCTTGGTAAAATAGAATTGCCAATAAACC                  |
| Spd_sr43                  | CCCTTCGCCAGTCTTAACTGTATCAGTTCAATGGG                      |
| Spd_sr45                  | CTTCCATCAGCTAGCATTACCTAGATTGAGTCAGAGGG                   |
| Spd_sr47                  | GAAAACACCTCTGTGTTATACTTGTGTTCAACCACAAAC                  |
| Spd_sr49                  | ATCGTTTCACAAGATGACGTGTGCTTTCACCCACAC                     |
| Spd_sr54                  | GATACGTCTTGTCTCGGCAGGATATTTATGAGTCG                      |
| Spd_sr55                  | CCCATAAGATCTATAATGAAAAGCGACCAAACAACCTC                   |
| Spd_sr57                  | GTGCCTGATTTTCTCTCCTAATTGTTATTAGTAGC                      |
| Spd_sr58 <sup>a</sup>     | GGATTTCCCCGATTTTTTGTGAAGACTCGCCTAGC                      |
| Spd_sr62                  | GACTTCACCCTTCTACTTTATCGCGCTCCTTGCCCTGCCTC                |
| Spd_sr66                  | TTTCCCAACTAAAAGCACTCCAGTTACCGCAACGG                      |
| Spd_sr67                  | CTAAATCGCATTCCATCAACTTCATCTGTTTCGTC                      |
| Spd_sr70                  | CTCTGGACTAAGACAAGTGAAAATCAATTCTCAAC                      |
| Spd_sr71                  | CTACATGTGATGGCAATCAAGATATCAAGAATCATCCTAC                 |
| Spd_sr73                  | AAGAGTAAACTCAGCTAGTCCAACTAACTGAGTT                       |
| Spd_sr74                  | CTACAGAAAGCGCCAGCCCTTTATTTTGCCCTACT                      |
| Spd_sr78                  | CACTATCACAGGTTTCTGCCAGCTACTCCCTTGAG                      |
| Spd_sr80                  | GAGGGACACCTCTGATCGGCTCTAACGTGGCCACC                      |
| Spd_sr81                  | GGCAAATACATAAAAAGCTAACTGAACATTCTCGTATCC                  |
| Spd_sr82                  | CATTATCACACCTTTCTAAGGTGGTTTTTTTATCCCGT                   |
| Spd_sr83                  | TTACTTTAATCGTTACTGTCATATGAGAGTCCTCG                      |
| Spd_sr84                  | AATATGGGAGCCTTTACCGCCTCTAGTCTTTATCC                      |
| Spd_sr85                  | AGACGGCCTACATGCTGTTAGAAGACTTTTTGTTTC                     |
| Spd_sr88                  | CCAACCACCTATTCACAATCACCACAGGCTCCC                        |
| Spd_sr89                  | CTGATTGATCGTTCATTATGATTCCTTGACTGAACGAAC                  |
| Spd_sr96                  | GATTGCTCCAGTAATAAAACCATTGGGAATGAAGG                      |
| Spd_sr99                  | CATCAAGTGCTCCTGACGCAACATACCATAGTCCG                      |
| Spd_sr100 <sup>a</sup>    | TTCTCTGTGTGTAGTGTACTTGCCACAATGCTTAC                      |
| Spd_sr106                 | ATGTGAGATAAAACGTGCTGTCGGTAAAAGCAAGC                      |
| Spd_sr108                 | GAAAATCAAAGTGCAAACCTAGGAAGCTAGCCGCAG                     |
| Spd_sr109                 | CTATGATAAGGCTCATTAGTTTCACCTCCTCTCAC                      |

|           |                                           |
|-----------|-------------------------------------------|
| Spd_sr111 | CACCTCCTCTCACGAACCCATAGGAACGTAATCGG       |
| Spd_sr114 | GTGCGGTCGAAGTTTAACTTCCTCTCAGACTGT         |
| Spd_sr116 | ACTTCAACTCGCAAACGACCCAAGGGCAACTGCTT       |
| CcnC      | TTTGTTACAACAAGTTAGGAGGTCTTCTTGTAACC       |
| CcnB      | CTCCACCTGATTGGGTGGAGTTAAGGGAGATTATTATG    |
| CcnE      | TAAAAGCCACCCATACAGGCGACTTTTGAAGGAG        |
| CcnD      | GGGAGATTATTATGAAAAAGTTTTAGGAGTTTAAGTTAAGG |
| F14       | CAACTACTGTCCAAATCATACCAATTATGAACGG        |
| F23       | CGGTTATCTTCTACCTATCTATTTTTTCAACTCCT       |

69

70

<sup>a</sup>Probes were designed within regions that were slightly upstream or downstream of the

71

coordinates predicted for these sRNAs.

72

<sup>b</sup>The presence of Spd\_sr36 can be validated with both the probes -Spd\_sr36-1 and Spd\_sr36-2.

73  
74

## SUPPLEMENTAL FIGURES

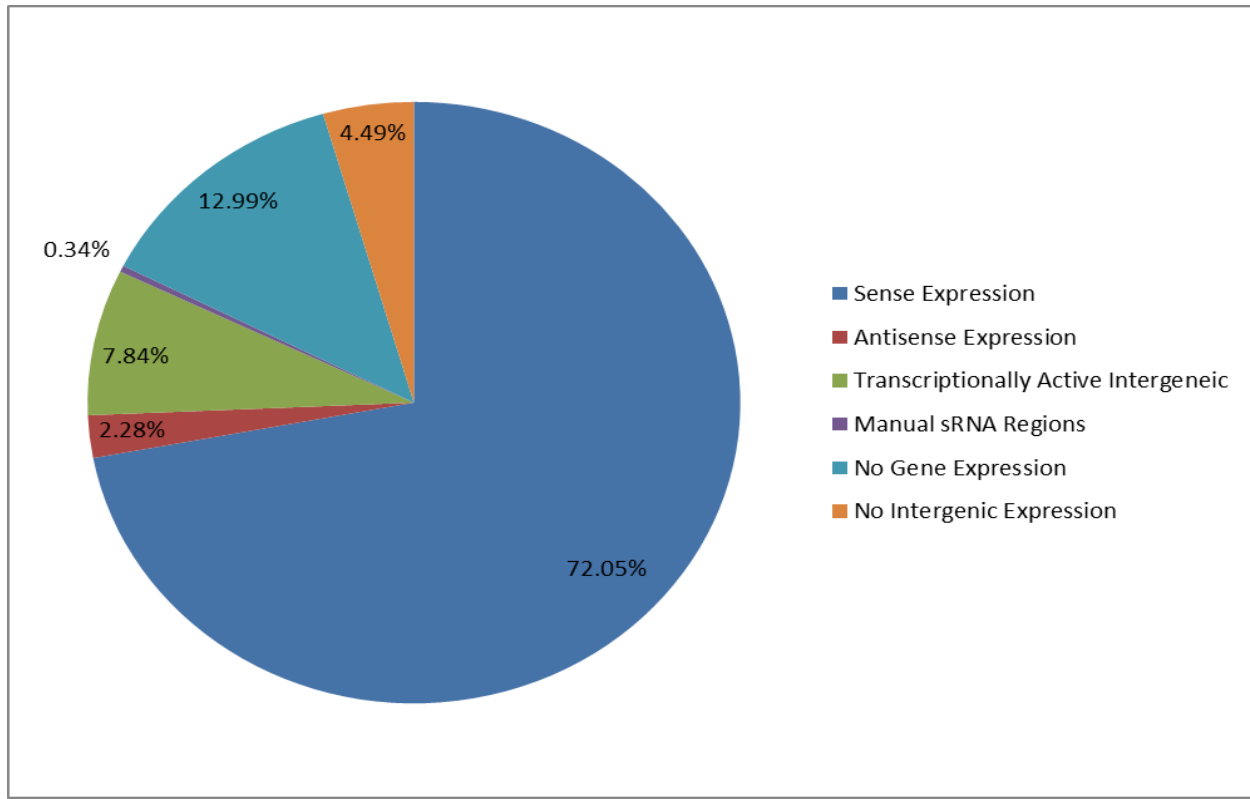

75  
76  
77

**Fig. S1. Transcriptome map of *S. pneumoniae* D39.** Comprehensive map showing the distribution of expressed and unexpressed genes and intergenic regions, expressed sRNAs, and antisense transcripts of the *S. pneumoniae* D39W genome based on the minimum coverage threshold of eight read per base as determined for the mRNA-seq analysis.

78  
79  
80

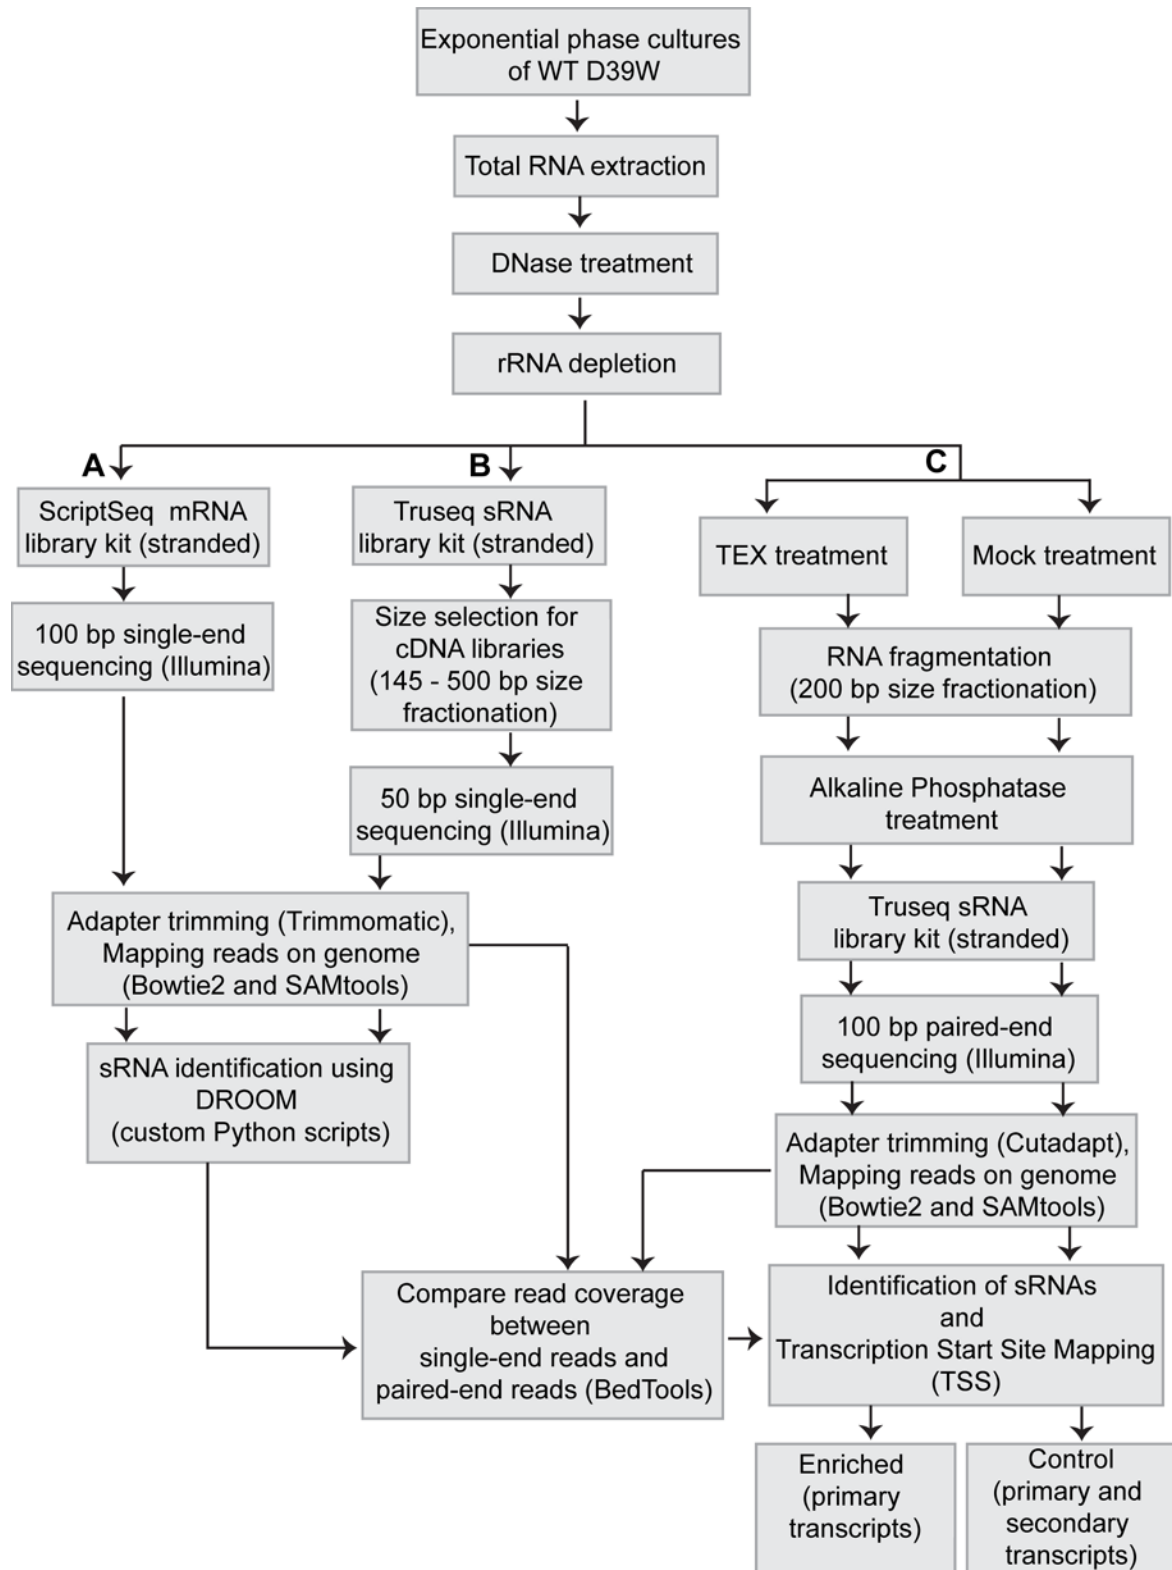

81

82

**Fig. S2. Experimental design and data analysis pipeline used to identify sRNAs in D39W.**

83

Combined data from mRNA-seq (A) and sRNA-seq (B) analysis were used to identify sRNAs in

84 D39W. Transcription start sites of the identified sRNAs were mapped using differential RNA-seq  
85 analysis (C). Paired-end sequencing data from dRNA-seq were used to independently identify  
86 sRNAs in D39W. Analysis was performed with sequencing reads (single-end and paired-end)  
87 that mapped to the D39W reference genome. Details of the experimental design and analysis  
88 are described in Materials and Methods.



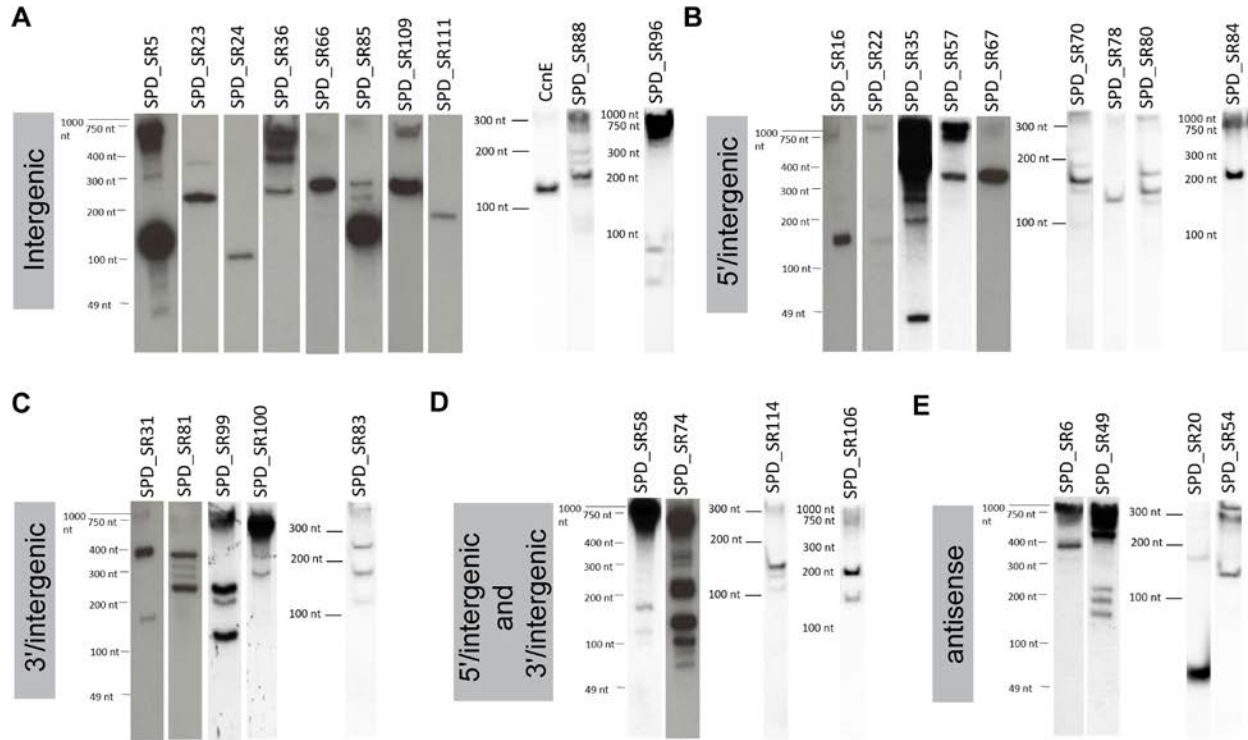

**Fig. S3. Northern blots corresponding to sRNAs identified in sRNA-seq.** Northern blot

validations corresponding to the sRNAs identified as intergenic, 5'/intergenic, 3'/intergenic,

5'/intergenic and 3'/intergenic or antisense by sRNA-seq analysis. Probes used for northern

blotting are listed in Table S5.

96  
97

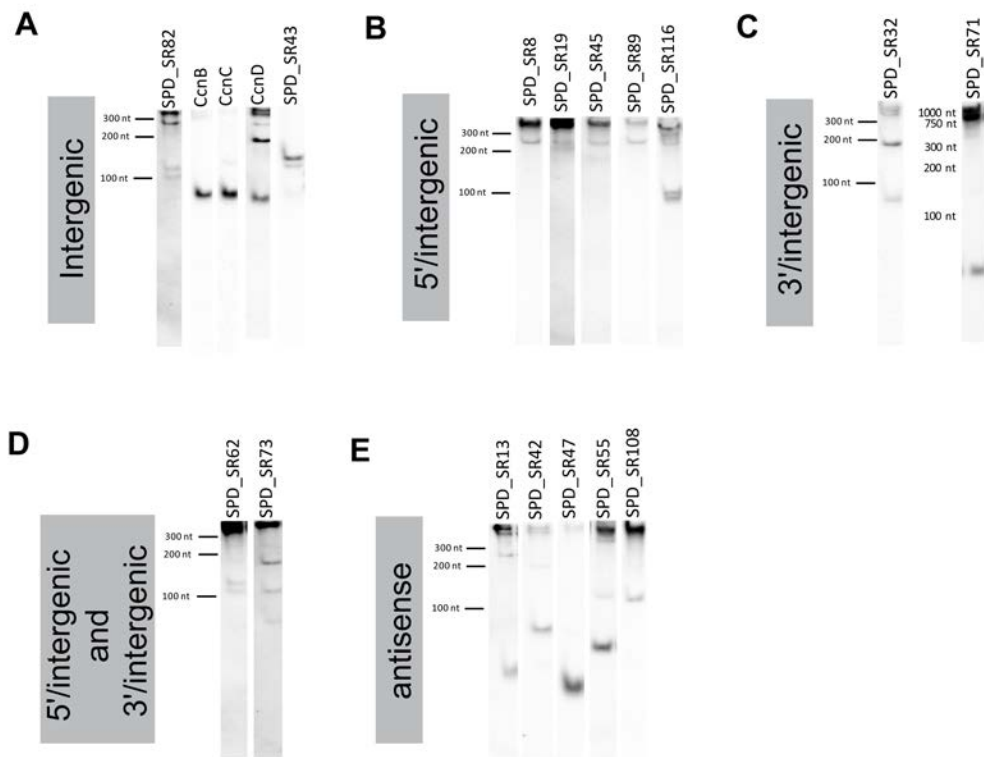

98  
99

**Fig. S4. Northern blots corresponding to sRNAs identified in dRNA-seq.** Northern blot

validations corresponding to the sRNAs identified as intergenic, 5'/intergenic, 3'/intergenic, 5'/intergenic and 3'/intergenic or antisense by dRNA-seq analysis. Probes used for northern blotting are listed in Table S5.

100  
101  
102

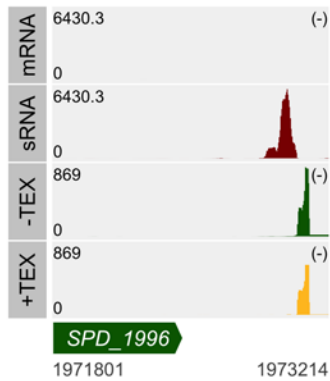

**Fig. S5. Coverage graph of Spd\_sr110, identified as an sRNA in D39W.** Spd\_sr110 was

predicted to be present in D39V (2), but was not identified as a sRNA by RNA-seq analysis in D39V. Spd\_sr110 identified as a sRNA by dRNA-seq analysis in D39W represented by the peaks in –TEX (in green) and + TEX (in yellow) tracks. Track labels corresponding to read coverage maps are described in the legend of Figure 2. The peak in the sRNA track corresponds to Spd\_sr109 sRNA identified by sRNA-seq analysis on the (+) strand. Spd\_sr109 and Spd\_sr110 are predicted to constitute a toxin-antitoxin module in D39.

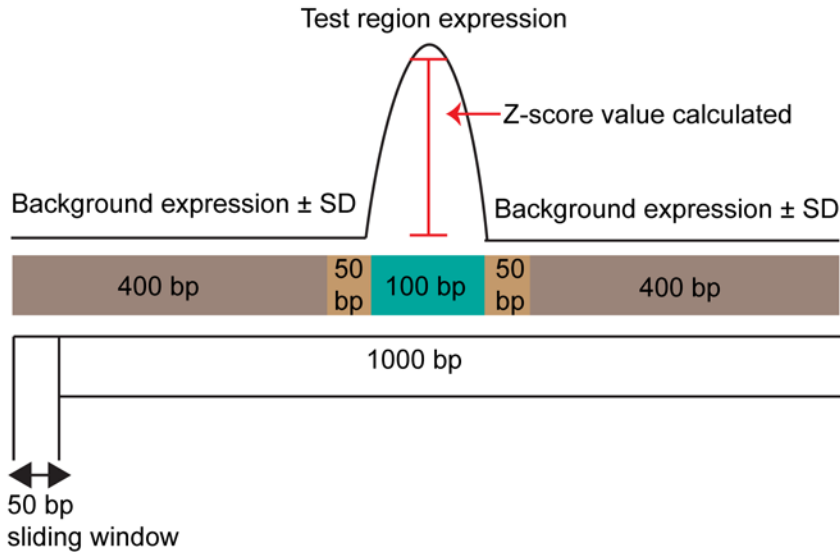

**Fig. S6. Schematic showing strategy used to identify sRNAs by RNA-seq.** A window of 1,000 base pairs in length was used. Predicted sRNAs identified as peaks in expression (100 bp test interval at the center in blue) relative to expression in neighboring portions of the genome (400 bp total to each side; flanking intervals in brown). The test area was flanked on either side by 50 bp of unused spacer sequence (in orange) to eliminate edge effects. The z-score of the test interval was determined relative to the mean and standard deviation (SD) observed in the flanking intervals. Analysis was performed genome-wide and z-scores calculated at 50 bp sliding intervals across the genome.

## SUPPLEMENTAL REFERENCES

1. **Tsui HCT, Mukherjee D, Ray VA, Sham LT, Feig AL, Winkler ME.** 2010. Identification and characterization of noncoding small RNAs in *Streptococcus pneumoniae* serotype 2 strain D39. *J Bacteriol* doi:10.1128/JB.01204-09.
2. **Slager J, Aprianto R, Veening J-W.** 2018. Deep genome annotation of the opportunistic human pathogen *Streptococcus pneumoniae* D39. *Nucleic Acids Res* **46**:9971-9989.
3. **Mann B, van Opijnen T, Wang J, Obert C, Wang Y-D, Carter R, McGoldrick DJ, Ridout G, Camilli A, Tuomanen EI, Rosch JW.** 2012. Control of virulence by small RNAs in *Streptococcus pneumoniae*. *PLoS pathog* **8**:e1002788-e1002788.
4. **Acebo P, Martin-Galiano AJ, Navarro S, Zaballos A, Amblar M.** 2012. Identification of 88 regulatory small RNAs in the TIGR4 strain of the human pathogen *Streptococcus pneumoniae*. *RNA* **18**:530-546.
5. **Halfmann A, Kovács M, Hakenbeck R, Brückner R.** 2007. Identification of the genes

135  
136  
137  
138  
139  
140

directly controlled by the response regulator CiaR in *Streptococcus pneumoniae*: five out of 15 promoters drive expression of small non-coding RNAs. Mol Microbiol **66**:110-126.

6. **Schnorpfeil A, Kranz M, Kovács M, Kirsch C, Gartmann J, Brunner I, Bittmann S, Brückner R.** 2013. Target evaluation of the non-coding csRNAs reveals a link of the two-component regulatory system CiaRH to competence control in *Streptococcus pneumoniae* R6. Mol Microbiol **89**:334-349.
